# Supplementary material for: Review of exclusive enteral therapy in adult Crohn’s disease
Source: PubMed Central journal article supplement — BMJ Open Gastroenterol. 2021 Sep 27;8(1):e000745. doi: 10.1136/bmjgast-2021-000745 (PMC8477235; doi:10.1136/bmjgast-2021-000745), 2021-09-27
Supplement: bmjgast-2021-000745supp001.pdf [file bmjgast-2021-000745supp001.pdf]

**Supplementary material****Table 1, supplementary: Studies of adult CD patients treated with enteral nutrition, considered for this review**

| Reference       | Year | Study type                         | Reason for not used in narrative review (if applicable)                                      |
|-----------------|------|------------------------------------|----------------------------------------------------------------------------------------------|
| Sharma et al(1) | 2021 | Retrospective observational cohort | Uncontrolled, lower level of evidence than other studies                                     |
| Guo et al(2)    | 2013 | Prospective observational cohort   | Small patient numbers, uncontrolled, lower level evidence than other studies                 |
| Li et al(3)     | 2014 | Retrospective observational cohort | Uncontrolled, lower level evidence than other studies                                        |
| Li et al(4)     | 2015 | Retrospective observational cohort | Abstraction of data may be biased. Long term nature of this study may lead to selection bias |
| Leach et al(5)  | 2008 | Prospective observational cohort   | Small patient numbers, uncontrolled, lower level evidence than other studies                 |
| Zachos et al(6) | 2007 | Meta-analysis                      | Lower level evidence than other studies                                                      |
| Chen et al(7)   | 2019 | Prospective observational cohort   | Small patient numbers, uncontrolled, lower level evidence than other studies                 |
| Gorard et al(8) | 1993 | Randomised                         | Small patient                                                                                |

|                         |      |                                    |                                                                                              |
|-------------------------|------|------------------------------------|----------------------------------------------------------------------------------------------|
|                         |      | controlled trial                   | numbers, high dropout rate in the EEN arm                                                    |
| Gonzalez -Huix et al(9) | 1993 | Randomised controlled trial        | Small patient numbers.                                                                       |
| Lochs et al(10)         | 1991 | Randomised controlled trial        | Lower level evidence than other studies                                                      |
| Yu et al(11)            | 2019 | Meta-analysis                      | Paediatric Population                                                                        |
| Okada et al (12)        | 1990 | Randomised controlled trial        | Small patient numbers.                                                                       |
| O'Moráin et al(13)      | 1984 | Randomised controlled trial        | Small patient numbers.                                                                       |
| Zoli et al(14)          | 1997 | Randomised controlled trial        | Small patient numbers.                                                                       |
| Hirai et al(15)         | 2013 | Retrospective observational cohort | Abstraction of data may be biased. Long term nature of this study may lead to selection bias |
| Kucharski et al(16)     | 2020 | Case report                        | Small patient numbers, uncontrolled, lower level evidence than other studies                 |
| Xiu et al(17)           | 2019 | Case report                        | Small patient numbers, uncontrolled, lower level evidence than other studies                 |
| Xu et al(18)            | 2019 | Retrospective observational cohort | Uncontrolled, lower level evidence than other studies                                        |
| Tsertsvadze et al(19)   | 2015 | Review                             | No meta-analysis was performed                                                               |
| Yamamoto et al(20)      | 2010 | Review                             | Level of evidence is low                                                                     |
| Kuriyama et al(21)      | 2009 | Cross sectional study              | Study examined quality of life as end goal not remission                                     |

|                             |      |                                    |                                                                                                                                           |
|-----------------------------|------|------------------------------------|-------------------------------------------------------------------------------------------------------------------------------------------|
| Esaki et al(22)             | 2006 | Retrospective observational cohort | Abstraction of data may be biased, prone to selection bias                                                                                |
| Bamba et al(23)             | 2003 | Randomised controlled trial        | Small patient numbers. Did not use EEN as an intervention                                                                                 |
| Sakura et al(24)            | 2002 | Randomised controlled trial        | Small patient numbers. All arms of the trial were EEN formulations that differ by fat content. No control arm against other interventions |
| Gassull et al(25)           | 2002 | Randomised controlled trial        | Trial used partial enteral nutrition as intervention arm                                                                                  |
| Verma et al(26)             | 2000 | Randomised controlled trial        | Small patient numbers.                                                                                                                    |
| Verma et al(27)             | 2000 | Randomised controlled trial        | Small patient numbers.                                                                                                                    |
| Matsueda et al(28)          | 1995 | Retrospective observational cohort | Collected data using questionnaire. Prone to recall bias                                                                                  |
| Fernandez-Banares et al(29) | 1995 | Meta-analysis                      | RCTs included in meta-analysis had small patient numbers                                                                                  |
| Griffiths et al(30)         | 1995 | Meta-analysis                      | RCTs included in meta-analysis had small patient numbers                                                                                  |
| Mansfield et al(31)         | 1995 | Randomised controlled trial        | Small patient numbers, high dropout rates                                                                                                 |
| Royall et al(32)            | 1995 | Randomised controlled trial        | Small patient numbers.                                                                                                                    |
| Hirakawa et al(33)          | 1993 | Retrospective observational cohort | Small patient numbers, high dropout rates                                                                                                 |
| Raouf et al(34)             | 1991 | Randomised                         | Small patient                                                                                                                             |

|                                |      |                                    |                                                                                                        |
|--------------------------------|------|------------------------------------|--------------------------------------------------------------------------------------------------------|
|                                |      | controlled trial                   | numbers.                                                                                               |
| Giaffer et al(35)              | 1991 | Prospective observational cohort   | Small patient numbers.                                                                                 |
| Wang et al(36)                 | 2018 | Retrospective observational cohort | Not involving EEN                                                                                      |
| Gatti et al(37)                | 2017 | Review                             | No meta-analysis performed                                                                             |
| Ludvigsson et al(38)           | 2004 | Randomised controlled trial        | Paediatric population                                                                                  |
| Yamamoto et al(39)             | 2013 | Comment to journal                 | Lower level evidence than other studies                                                                |
| Yamamoto et al(40)             | 2010 | Prospective observational cohort   | Small patient numbers, high dropout rates                                                              |
| Comeche et al(41)              | 2019 | Meta-analysis                      | Population includes patients with both CD and UC                                                       |
| Mańkowska-Wierzbicka et al(42) | 2019 | Prospective observational cohort   | Population includes patients with both CD and UC                                                       |
| Li et al(43)                   | 2014 | Prospective observational cohort   | Small patient numbers, lower level evidence than other studies                                         |
| Ramaswamy et al(44)            | 2020 | Retrospective observational cohort | Abstraction of data may be biased, uncontrolled, unrandomized, lower level evidence than other studies |
| Narula et al(45)               | 2018 | Review                             |                                                                                                        |
| D'Haens et al(46)              | 2004 | Editorial Letter                   |                                                                                                        |
| Grover et al(47)               | 2016 | Randomised controlled trial        |                                                                                                        |
| Modigliani et al(48)           | 1990 | Prospective observational cohort   |                                                                                                        |
| Chen et al(49)                 | 2019 | Prospective observational cohort   |                                                                                                        |

|                        |      |                                    |  |
|------------------------|------|------------------------------------|--|
| Borrelli et al(50)     | 2006 | Randomised controlled trial        |  |
| Wall et al(51)         | 2013 | Review                             |  |
| Wall et al(52)         | 2017 | Prospective observational cohort   |  |
| Schwab et al(53)       | 1998 | Meta-Analysis                      |  |
| Yang et al(54)         | 2020 | Retrospective observational cohort |  |
| Frivolt et al(55)      | 2014 | Retrospective observational cohort |  |
| Yan et al(56)          | 2014 | Retrospective observational cohort |  |
| Matsueda et al(57)     | 2000 | Retrospective observational cohort |  |
| Hu et al(58)           | 2014 | Prospective observational cohort   |  |
| Yang et al(59)         | 2017 | Prospective observational cohort   |  |
| Brennan et al(60)      | 2018 | Meta-analysis                      |  |
| Li et al(43)           | 2014 | Prospective observational cohort   |  |
| Li et al(4)            | 2015 | Prospective observational cohort   |  |
| Ge et al(61)           | 2019 | Prospective observational cohort   |  |
| Heerasing et al(62)    | 2017 | Retrospective observational cohort |  |
| Zheng et al(63)        | 2017 | Retrospective observational cohort |  |
| Mitrev et al(64)       | 2019 | Retrospective observational cohort |  |
| Costa-Santos et al(65) | 2020 | Prospective observational cohort   |  |
| Beaupel et al(66)      | 2017 | Prospective observational cohort   |  |
| Wang et al(67)         | 2016 | Retrospective observational cohort |  |
| Yamamoto et al(68)     | 2007 | Prospective observational cohort   |  |
| Yamamoto et al(39)     | 2013 | Prospective observational cohort   |  |
| Esaki et al(69)        | 2005 | Prospective observational cohort   |  |
| Pigneur et al(70)      | 2021 | Randomised controlled trial        |  |
| Takagi et al(71)       | 2006 | Randomised                         |  |

|                       |      |                                    |  |
|-----------------------|------|------------------------------------|--|
|                       |      | controlled trial                   |  |
| Duncan et al(72)      | 2004 | Retrospective observational cohort |  |
| Day et al(73)         | 2006 | Retrospective observational cohort |  |
| Wilschanski et al(74) | 1996 | Retrospective observational cohort |  |
| Hirai et al(75)       | 2020 | Meta-analysis                      |  |
| Luo et al(76)         | 2017 | Randomised controlled trial        |  |
| Nguyen et al(77)      | 2015 | Meta-analysis                      |  |
| Sazuka et al(78)      | 2012 | Retrospective observational cohort |  |
| Sood et al(79)        | 2015 | Retrospective observational cohort |  |

## Full references

1. Sharma S, Gupta A, Kedia S, Agarwal S, Singh N, Goyal S, et al. Efficacy and tolerability of exclusive enteral nutrition in adult patients with complicated Crohn's disease. *Intest Res*. 2021;19(3):291-300.
2. Guo Z, Wu R, Zhu W, Gong J, Zhang W, Li Y, et al. Effect of exclusive enteral nutrition on health-related quality of life for adults with active Crohn's disease. *Nutr Clin Pract*. 2013;28(4):499-505.
3. Li G, Ren J, Wang G, Hu D, Gu G, Liu S, et al. Preoperative exclusive enteral nutrition reduces the postoperative septic complications of fistulizing Crohn's disease. *Eur J Clin Nutr*. 2014;68(4):441-6.
4. Li Y, Zuo L, Zhu W, Gong J, Zhang W, Gu L, et al. Role of exclusive enteral nutrition in the preoperative optimization of patients with Crohn's disease following immunosuppressive therapy. *Medicine (Baltimore)*. 2015;94(5):e478.
5. Leach ST, Mitchell HM, Eng WR, Zhang L, Day AS. Sustained modulation of intestinal bacteria by exclusive enteral nutrition used to treat children with Crohn's disease. *Alimentary Pharmacology & Therapeutics*. 2008;28(6):724-33.
6. Zachos M, Tondeur M, Griffiths AM. Enteral nutritional therapy for induction of remission in Crohn's disease. *Cochrane Database Syst Rev*. 2007(1):Cd000542.
7. Chen JM, He LW, Yan T, Guo XF, Hu PJ, Peng JS, et al. Oral exclusive enteral nutrition induces mucosal and transmural healing in patients with Crohn's disease. *Gastroenterol Rep (Oxf)*. 2019;7(3):176-84.
8. Gorard DA, Hunt JB, Payne-James JJ, Palmer KR, Rees RG, Clark ML, et al. Initial response and subsequent course of Crohn's disease treated with elemental diet or prednisolone. *Gut*. 1993;34(9):1198-202.
9. González-Huix F, de León R, Fernández-Bañares F, Esteve M, Cabré E, Acero D, et al. Polymeric enteral diets as primary treatment of active Crohn's disease: a prospective steroid controlled trial. *Gut*. 1993;34(6):778-82.
10. Lochs H, Steinhardt HJ, Klaus-Wentz B, Zeitz M, Vogelsang H, Sommer H, et al. Comparison of enteral nutrition and drug treatment in active Crohn's disease.

Results of the European Cooperative Crohn's Disease Study. IV. Gastroenterology. 1991;101(4):881-8.

11. Yu Y, Chen KC, Chen J. Exclusive enteral nutrition versus corticosteroids for treatment of pediatric Crohn's disease: a meta-analysis. *World J Pediatr*. 2019;15(1):26-36.

12. Okada M, Yao T, Yamamoto T, Takenaka K, Imamura K, Maeda K, et al. Controlled trial comparing an elemental diet with prednisolone in the treatment of active Crohn's disease. *Hepatogastroenterology*. 1990;37(1):72-80.

13. O'Moráin C, Segal AW, Levi AJ. Elemental diet as primary treatment of acute Crohn's disease: a controlled trial. *Br Med J (Clin Res Ed)*. 1984;288(6434):1859-62.

14. Zoli G, Carè M, Parazza M, Spanò C, Biagi PL, Bernardi M, et al. A randomized controlled study comparing elemental diet and steroid treatment in Crohn's disease. *Aliment Pharmacol Ther*. 1997;11(4):735-40.

15. Hirai F, Ishihara H, Yada S, Esaki M, Ohwan T, Nozaki R, et al. Effectiveness of concomitant enteral nutrition therapy and infliximab for maintenance treatment of Crohn's disease in adults. *Dig Dis Sci*. 2013;58(5):1329-34.

16. Kucharski MA, Wierzbicka A, Tsibulski A, Sotiri E, Dobrowolska A, Mańkowska-Wierzbicka D. Parenteral and Enteral Nutrition: A Bridge to Healing and Biological Therapy in a Patient With Enterocutaneous Fistula and Sepsis Complicated Crohn's Disease. *Journal of Parenteral and Enteral Nutrition*. 2021;45(2):430-3.

17. Xie C, Lin J, Su J, Ren J. Synergistic effect of enteral nutrition on remission induction in a patient with penetrating Crohn disease: A case report. *Medicine*. 2019;98(32):e16750-e.

18. Xu Y, Guo Z, Cao L, Xie T, Shen W, Li Y, et al. Isolated colonic Crohn's disease is associated with a reduced response to exclusive enteral nutrition compared to ileal or ileocolonic disease. *Clin Nutr*. 2019;38(4):1629-35.

19. Tsertsvadze A, Gurung T, Court R, Clarke A, Sutcliffe P. Clinical effectiveness and cost-effectiveness of elemental nutrition for the maintenance of remission in Crohn's disease: a systematic review and meta-analysis. *Health Technol Assess*. 2015;19(26):1-138.

20. Yamamoto T, Nakahigashi M, Umegae S, Matsumoto K. Enteral nutrition for the maintenance of remission in Crohn's disease: a systematic review. *Eur J Gastroenterol Hepatol*. 2010;22(1):1-8.

21. Kuriyama M, Kato J, Morimoto N, Fujimoto T, Kono H, Okano N, et al. Enteral nutrition improves health-related quality of life in Crohn's disease patients with long disease duration. *Hepatogastroenterology*. 2009;56(90):321-7.

22. Esaki M, Matsumoto T, Nakamura S, Yada S, Fujisawa K, Jo Y, et al. Factors affecting recurrence in patients with Crohn's disease under nutritional therapy. *Dis Colon Rectum*. 2006;49(10 Suppl):S68-74.

23. Bamba T, Shimoyama T, Sasaki M, Tsujikawa T, Fukuda Y, Koganei K, et al. Dietary fat attenuates the benefits of an elemental diet in active Crohn's disease: a randomized, controlled trial. *Eur J Gastroenterol Hepatol*. 2003;15(2):151-7.

24. Sakurai T, Matsui T, Yao T, Takagi Y, Hirai F, Aoyagi K, et al. Short-term efficacy of enteral nutrition in the treatment of active Crohn's disease: a randomized, controlled trial comparing nutrient formulas. *JPEN J Parenter Enteral Nutr*. 2002;26(2):98-103.

25. Gassull MA, Fernández-Bañares F, Cabré E, Papo M, Giaffer MH, Sánchez-Lombraña JL, et al. Fat composition may be a clue to explain the primary therapeutic



- effect of enteral nutrition in Crohn's disease: results of a double blind randomised multicentre European trial. *Gut*. 2002;51(2):164-8.
26. Verma S, Kirkwood B, Brown S, Giaffer MH. Oral nutritional supplementation is effective in the maintenance of remission in Crohn's disease. *Dig Liver Dis*. 2000;32(9):769-74.
27. Verma S, Brown S, Kirkwood B, Giaffer MH. Polymeric versus elemental diet as primary treatment in active Crohn's disease: a randomized, double-blind trial. *Am J Gastroenterol*. 2000;95(3):735-9.
28. Matsueda K, Shoda R, Takazoe M, Hiwatashi N, Bamba T, Kobayashi K, et al. Therapeutic efficacy of cyclic home elemental enteral alimentation in Crohn's disease: Japanese cooperative Crohn's disease study. *J Gastroenterol*. 1995;30 Suppl 8:91-4.
29. Fernández-Banares F, Cabré E, Esteve-Comas M, Gassull MA. How effective is enteral nutrition in inducing clinical remission in active Crohn's disease? A meta-analysis of the randomized clinical trials. *JPEN J Parenter Enteral Nutr*. 1995;19(5):356-64.
30. Griffiths AM, Ohlsson A, Sherman PM, Sutherland LR. Meta-analysis of enteral nutrition as a primary treatment of active Crohn's disease. *Gastroenterology*. 1995;108(4):1056-67.
31. Mansfield JC, Giaffer MH, Holdsworth CD. Controlled trial of oligopeptide versus amino acid diet in treatment of active Crohn's disease. *Gut*. 1995;36(1):60-6.
32. Royall D, Jeejeebhoy KN, Baker JP, Allard JP, Habal FM, Cunnane SC, et al. Comparison of amino acid v peptide based enteral diets in active Crohn's disease: clinical and nutritional outcome. *Gut*. 1994;35(6):783-7.
33. Hirakawa H, Fukuda Y, Tanida N, Hosomi M, Shimoyama T. Home elemental enteral hyperalimentation (HEEH) for the maintenance of remission in patients with Crohn's disease. *Gastroenterol Jpn*. 1993;28(3):379-84.
34. Raouf AH, Hildrey V, Daniel J, Walker RJ, Krasner N, Elias E, et al. Enteral feeding as sole treatment for Crohn's disease: controlled trial of whole protein v amino acid based feed and a case study of dietary challenge. *Gut*. 1991;32(6):702.
35. Giaffer MH, Cann P, Holdsworth CD. Long-term effects of elemental and exclusion diets for Crohn's disease. *Aliment Pharmacol Ther*. 1991;5(2):115-25.
36. Wang G, Ren J, Li G, Hu Q, Gu G, Ren H, et al. The utility of food antigen test in the diagnosis of Crohn's disease and remission maintenance after exclusive enteral nutrition. *Clin Res Hepatol Gastroenterol*. 2018;42(2):145-52.
37. Gatti S, Galeazzi T, Franceschini E, Annibali R, Albano V, Verma AK, et al. Effects of the Exclusive Enteral Nutrition on the Microbiota Profile of Patients with Crohn's Disease: A Systematic Review. *Nutrients*. 2017;9(8).
38. Ludvigsson JF, Krantz M, Bodin L, Stenhammar L, Lindquist B. Elemental versus polymeric enteral nutrition in paediatric Crohn's disease: a multicentre randomized controlled trial. *Acta Paediatr*. 2004;93(3):327-35.
39. Yamamoto T, Shiraki M. Efficacy of enteral nutrition during infliximab maintenance therapy in patients with Crohn's disease. *Dig Dis Sci*. 2013;58(6):1802-3.
40. Yamamoto T, Nakahigashi M, Umegae S, Matsumoto K. Prospective clinical trial: enteral nutrition during maintenance infliximab in Crohn's disease. *J Gastroenterol*. 2010;45(1):24-9.
41. Comeche JM, Caballero P, Gutierrez-Hervas A, García-Sanjuan S, Comino I, Altavilla C, et al. Enteral Nutrition in Patients with Inflammatory Bowel Disease. Systematic Review, Meta-Analysis, and Meta-Regression. *Nutrients*. 2019;11(11).



42. Mańkowska-Wierzbicka D, Karczewski J, Swora-Cwynar E, Dobrowolska A, Stelmach-Mardas M. The Clinical Importance of 21-Day Combined Parenteral and Enteral Nutrition in Active Inflammatory Bowel Disease Patients. *Nutrients*. 2019;11(9).
43. Li Y, Zhu W, Gong J, Zuo L, Zhang W, Gu L, et al. Influence of exclusive enteral nutrition therapy on visceral fat in patients with Crohn's disease. *Inflamm Bowel Dis*. 2014;20(9):1568-74.
44. Ramaswamy PK MR, Lan X, Angus R, Chen Y, Moattar H, et al. Exclusive Enteral Nutrition with a polymeric diet is efficacious in inducing remission in adults with active Crohn's disease. *Digestive Diseases Week 2020*. 2020.
45. Narula N, Dhillon A, Zhang D, Sherlock ME, Tondeur M, Zachos M. Enteral nutritional therapy for induction of remission in Crohn's disease. *Cochrane Database Syst Rev*. 2018;4:Cd000542.
46. D'Haens G. Mucosal healing in pediatric Crohn's disease: the goal of medical treatment. *Inflamm Bowel Dis*. 2004;10(4):479-80.
47. Greenberg GR, Feagan BG, Martin F, Sutherland LR, Thomson AB, Williams CN, et al. Oral budesonide for active Crohn's disease. Canadian Inflammatory Bowel Disease Study Group. *N Engl J Med*. 1994;331(13):836-41.
48. Modigliani R, Mary J-Y, Simon J-F, Cortot A, Soule J-C, Gendre J-P, et al. Clinical, biological, and endoscopic picture of attacks of Crohn's disease: Evolution on prednisolone. *Gastroenterology*. 1990;98(4):811-8.
49. Chen J-M, He L-W, Yan T, Guo X-F, Hu P-J, Peng J-S, et al. Oral exclusive enteral nutrition induces mucosal and transmural healing in patients with Crohn's disease. *Gastroenterology Report*. 2019;7(3):176-84.
50. Borrelli O, Cordischi L, Cirulli M, Paganelli M, Labalestra V, Uccini S, et al. Polymeric diet alone versus corticosteroids in the treatment of active pediatric Crohn's disease: a randomized controlled open-label trial. *Clin Gastroenterol Hepatol*. 2006;4(6):744-53.
51. Wall CL, Day AS, Geary RB. Use of exclusive enteral nutrition in adults with Crohn's disease: a review. *World journal of gastroenterology*. 2013;19(43):7652-60.
52. Wall CL, Geary RB, Day AS. Treatment of Active Crohn's Disease with Exclusive and Partial Enteral Nutrition: A Pilot Study in Adults. *Inflammatory Intestinal Diseases*. 2017;2(4):219-27.
53. Schwab D, Raithel M, Hahn EG. [Enteral nutrition in acute Crohn disease]. *Z Gastroenterol*. 1998;36(11):983-95.
54. Yang Q LM, Yao J, Ding N, Zhi M, Hu P, et al. Exclusive enteral nutrition is effective for female Crohn's disease patients who are pregnant or preparing for pregnancy. *Digestive Diseases Week 2020*. 2020.
55. Frivolt K, Schwerdt T, Werkstetter KJ, Schwarzer A, Schatz SB, Bufler P, et al. Repeated exclusive enteral nutrition in the treatment of paediatric Crohn's disease: predictors of efficacy and outcome. *Aliment Pharmacol Ther*. 2014;39(12):1398-407.
56. Yan D, Ren J, Wang G, Liu S, Li J. Predictors of response to enteral nutrition in abdominal enterocutaneous fistula patients with Crohn's disease. *Eur J Clin Nutr*. 2014;68(8):959-63.
57. Matsueda K. Therapeutic efficacy of elemental enteral alimentation in Crohn's disease. *J Gastroenterology*. 2000.
58. Hu D, Ren J, Wang G, Li G, Liu S, Yan D, et al. Exclusive enteral nutritional therapy can relieve inflammatory bowel stricture in Crohn's disease. *J Clin Gastroenterol*. 2014;48(9):790-5.

59. Yang Q, Gao X, Chen H, Li M, Wu X, Zhi M, et al. Efficacy of exclusive enteral nutrition in complicated Crohn's disease. *Scand J Gastroenterol*. 2017;52(9):995-1001.
60. Brennan GT, Ha I, Hogan C, Nguyen E, Jamal MM, Bechtold ML, et al. Does preoperative enteral or parenteral nutrition reduce postoperative complications in Crohn's disease patients: a meta-analysis. *Eur J Gastroenterol Hepatol*. 2018;30(9):997-1002.
61. Ge X, Tang S, Yang X, Liu W, Ye L, Yu W, et al. The role of exclusive enteral nutrition in the preoperative optimization of laparoscopic surgery for patients with Crohn's disease: A cohort study. *Int J Surg*. 2019;65:39-44.
62. Heerasing N, Thompson B, Hendy P, Heap GA, Walker G, Bethune R, et al. Exclusive enteral nutrition provides an effective bridge to safer interval elective surgery for adults with Crohn's disease. *Aliment Pharmacol Ther*. 2017;45(5):660-9.
63. Zheng XB, Peng X, Xie XY, Lian L, Wu XR, Hu JC, et al. Enteral nutrition is associated with a decreased risk of surgical intervention in Crohn's disease patients with spontaneous intra-abdominal abscess. *Rev Esp Enferm Dig*. 2017;109(12):834-42.
64. Mitrev N LR, Nguyen TMP, Hannah B, Leong RW, Kariyawasam V. Exclusive enteral nutrition associated with reduced short-term surgery rates in adult Crohn's disease: local experiences of two IBD services. *Australian Gastroenterology Week 2019*. 2019.
65. Costa-Santos MP, Palmela C, Torres J, Ferreira A, Velho S, Ourô S, et al. Preoperative enteral nutrition in adults with complicated Crohn's disease: Effect on disease outcomes and gut microbiota. *Nutrition*. 2020;70s:100009.
66. Beaupeil N, Brouquet A, Abdalla S, Carbonnel F, Penna C, Benoist S. Preoperative oral polymeric diet enriched with transforming growth factor-beta 2 (Modulen) could decrease postoperative morbidity after surgery for complicated ileocolonic Crohn's disease. *Scand J Gastroenterol*. 2017;52(1):5-10.
67. Wang H, Zuo L, Zhao J, Dong J, Li Y, Gu L, et al. Impact of Preoperative Exclusive Enteral Nutrition on Postoperative Complications and Recurrence After Bowel Resection in Patients with Active Crohn's Disease. *World J Surg*. 2016;40(8):1993-2000.
68. Yamamoto T, Nakahigashi M, Umegae S, Kitagawa T, Matsumoto K. Impact of long-term enteral nutrition on clinical and endoscopic recurrence after resection for Crohn's disease: A prospective, non-randomized, parallel, controlled study. *Aliment Pharmacol Ther*. 2007;25(1):67-72.
69. Esaki M, Matsumoto T, Hizawa K, Nakamura S, Jo Y, Mibu R, et al. Preventive effect of nutritional therapy against postoperative recurrence of Crohn disease, with reference to findings determined by intra-operative enteroscopy. *Scand J Gastroenterol*. 2005;40(12):1431-7.
70. Arnaud B, Martinez-Vinson C, Bourmaud A, Swellen G, Duclaux-Loras R, Hugot J, et al. OP15 Cyclic exclusive enteral nutrition to maintain longterm drug-free remission in Paediatric Crohn's Disease: The CD HOPE study of the GETAID pédiatrique. *Journal of Crohn's and Colitis*. 2021;15:S015-S.
71. Takagi S, Utsunomiya K, Kuriyama S, Yokoyama H, Takahashi S, Iwabuchi M, et al. Effectiveness of an 'half elemental diet' as maintenance therapy for Crohn's disease: A randomized-controlled trial. *Aliment Pharmacol Ther*. 2006;24(9):1333-40.
72. Duncan H, Buchanan E, Cardigan T, Garrick V, Curtis L, McGrogan P, et al. A retrospective study showing maintenance treatment options for paediatric CD in the

first year following diagnosis after induction of remission with EEN: supplemental enteral nutrition is better than nothing! BMC gastroenterology. 2014;14:50-.

73. Day AS, Whitten KE, Lemberg DA, Clarkson C, Vitug-Sales M, Jackson R, et al. Exclusive enteral feeding as primary therapy for Crohn's disease in Australian children and adolescents: a feasible and effective approach. J Gastroenterol Hepatol. 2006;21(10):1609-14.

74. Wilschanski M, Sherman P, Pencharz P, Davis L, Corey M, Griffiths A. Supplementary enteral nutrition maintains remission in paediatric Crohn's disease. Gut. 1996;38(4):543-8.

75. Hirai F, Takeda T, Takada Y, Kishi M, Beppu T, Takatsu N, et al. Efficacy of enteral nutrition in patients with Crohn's disease on maintenance anti-TNF-alpha antibody therapy: a meta-analysis. Journal of gastroenterology. 2020;55(2):133-41.

76. Luo Y, Yu J, Lou J, Fang Y, Chen J. Exclusive Enteral Nutrition versus Infliximab in Inducing Therapy of Pediatric Crohn's Disease. Gastroenterology research and practice. 2017;2017:6595048-.

77. Nguyen DL, Palmer LB, Nguyen ET, McClave SA, Martindale RG, Bechtold ML. Specialized enteral nutrition therapy in Crohn's disease patients on maintenance infliximab therapy: a meta-analysis. Therapeutic advances in gastroenterology. 2015;8(4):168-75.

78. Sazuka S, Katsuno T, Nakagawa T, Saito M, Saito K, Matsumura T, et al. Concomitant use of enteral nutrition therapy is associated with sustained response to infliximab in patients with Crohn's disease. Eur J Clin Nutr. 2012;66(11):1219-23.

79. Sood A, Singh A, Sudhakar R, Midha V, Mahajan R, Mehta V, et al. Exclusive enteral nutrition for induction of remission in anti-tumor necrosis factor refractory adult Crohn's disease: the Indian experience. Intest Res. 2020;18(2):184-91.
